# Supplementary material
Source: HighWire-hosted journal article supplement (https://srh.bmj.com/content/45/4/290)
Supplement: inline-supplementary-material-1 [file inline-supplementary-material-1.pdf]

## PSYCHOLOGICAL KNOWLEDGE PRODUCTION ABOUT ABORTION: THE POLITICS OF LOCATION AND REPRESENTATION

Catriona Ida Macleod, Jabulile Mavuso, Malvern Chiweshe, Ryan du Toit

### Data set references

- Adler NE (1976) Sample Attrition in Studies of Psychosocial Sequelae of Abortion: How Great a Problem? *Journal of Applied Social Psychology* 6(3): 240–259.
- Adler NE, David HP, Major BN, et al. (1992) Psychological factors in abortion: A review. *American Psychologist* 47(10): 1194–1204.
- Adler NE, Ozer EJ and Tschann J (2003) Abortion among adolescents. *American Psychologist* 58(3): 211–217.
- Allanson S (2007) Abortion decision and ambivalence: insights via an abortion decision balance sheet. *Clinical Psychologist* 11(2): 50–60.
- Allgeier AR, Allgeier ER and Rywick T (1982) Response to requests for abortion: The influence of guilt and knowledge. *Journal of Applied Social Psychology* 12(4): 281–291.
- Alter R (1984) Abortion outcome as a function of sex-role identification. *Psychology of Women Quarterly* 8(3): 211–233.
- Ambuel B (1995) Adolescents, unintended pregnancy, and abortion: The struggle for a compassionate social policy. *Current Directions in Psychological Science* 4: 1–5.
- Baluk U and O’Neill PO (1980) Health professionals’ perceptions of the psychological consequences of abortion. *American Journal of Community Psychology* 8(1): 67–75.
- Bègue L (2001) Social judgment of abortion: a black-sheep effect in a Catholic sheepfold. *The Journal of Social Psychology* 141(5): 640–9.
- Bernas RS and Stein N (2001) Changing stances on abortion during case-based reasoning tasks: Who changes and under what conditions. *Discourse Processes* 32(3): 177–190.
- Boulind M and Edwards D (2008) The assessment and treatment of post-abortion syndrome: A systematic case study from southern Africa. *Journal of Psychology in Africa* 18(4): 539–548.
- Bradshaw Z and Slade P (2003) The Effects of Included Abortion on Emotional Experiences and Relationships: A Critical Review of the Literature. *Clinical Psychology Review* 23(7): 929–958.
- Bridges SF, Williamson B and Scheibe JJ (1998) Abortion affiliation, urban size, and geographic bias of responses to lost letters. *Psychological Reports* 83: 1107–1112.

- Brown RA and Facer W (1977) Abortion in New Zealand public hospitals: A twenty-five year review. *New Zealand Psychologist* 6: 124–133.
- Bryant L, Hewison JD and Green JM (2005) Attitudes towards prenatal diagnosis and termination in women who have a sibling with Down's syndrome. *Journal of Reproductive and Infant Psychology* 23(2): 181–198.
- Burnell GM and Norfleet M (1987) Women's self-reported responses to abortion. *The Journal of Psychology* 121(1): 71–76.
- Cameron P and Tichenor J (1976) The Swedish 'children born to women denied abortion' study: a radical criticism. *Psychological Reports* 39(2): 391–394.
- Cancelmo JA, Hart B, Herman JL, Rashbaum WK and Stein J (1992) Psychodynamic aspects of delayed abortion decisions. *British Journal of Medical Psychology* 65(4): 333–345.
- Clare AW and Tyrrell J (1994) Psychiatric aspects of abortion. *Irish Journal of Psychological Medicine* 11(02): 92–98.
- Cohan CL, Dunkel-Schetter C and Lydon J (1993) Pregnancy decision making: predictors of early stress and adjustment. *Psychology of Women Quarterly* 17: 223–239.
- Coleman PK, Reardon DC and Cogle J (2002) The quality of the caregiving environment and child development outcomes associated with maternal history of abortion using the NLSY data. *Journal of Child Psychology and Psychiatry and Allied Disciplines* 43: 743–757.
- Coleman PK, Reardon DC, Strahan T, et al. (2005) The psychology of abortion: A review and suggestions for future research. *Psychology and Health* 20(2): 237–271.
- Coleman PK and Nelson E (1998) The quality of abortion decisions and college students' reports of post-abortion emotional sequelae and abortion attitudes. *Journal of Social and Clinical Psychology* 17(4): 425–442.
- Coleman PK, Rue VM, Spence M and Coyle C (2008) Abortion and the sexual lives of men and women: Is casual sexual behavior more appealing and more common after abortion? *International Journal of Clinical and Health Psychology* 8(1): 77–91.
- Conklin MP and O'Connor BP (1995) Beliefs about the Fetus as a Moderator of Post-Abortion Psychological Well-Being. *Journal of Social and Clinical Psychology* 14(1): 76–95.
- Corenblum B (1973) Locus of control, latitude of acceptance and attitudes toward abortion. *Psychological Reports* 32: 753–754.
- Coyle CT and Enright RD (1997) Forgiveness intervention with postabortion men. *Journal of consulting and clinical psychology* 65(6): 1042–1046.
- Cozzarelli C (1993) Personality and self-efficacy as predictors of coping with abortion. *Journal of Personality and Social Psychology* 65(6): 1224–1237.

- Cozzarelli C and Major B (1994) The effects of anti-abortion demonstrators and pro-choice escorts on women's psychological responses to abortion. *Journal of Social and Clinical Psychology* 13(4): 404–427.
- Cozzarelli C, Karrasch A, Sumer N, et al. (1994) The Meaning and Impact of Partner's Accompaniment on Women's Adjustment to Abortion. *Journal of Applied Social Psychology* 24(22): 2028–2056.
- Cozzarelli C, Sumer N and Major B (1998) Mental models of attachment and coping with abortion. *Journal of Personality and Social Psychology* 74(2): 453–67.
- Cozzarelli C, Major B, Karrasch A, et al. (2000) Women's experiences of and reactions to antiabortion picketing. *Basic and Applied Social Psychology* 22(4): 265–275.
- Craig SC, Kane JG and Martinez M (2002) Sometimes you feel like a nut, sometimes you don't: Citizens ambivalence about abortion. *Political Psychology* 23(2): 285–301.
- Curley M and Johnston C (2014) Exploring treatment preferences for psychological services after abortion among college students. *Journal of Reproductive and Infant Psychology* 32(3): 304–320.
- Da Costa PC and Donald F (2003) The experience of person-role conflict in doctors expected to terminate pregnancies in the South African public sector. *South African Journal of Psychology* 33(1): 10–18.
- De Lange N, Geldenhuys JL, Poggenpoel M and Myburgh C (1999) Black South African adolescents' experiences of pregnancy termination. *Journal of Psychology in Africa* 9(2): 115–138.
- Dykes K, Slade P and Haywood A (2011) Long term follow-up of emotional experiences after termination of pregnancy: women's views at menopause. *Journal of Reproductive and Infant Psychology* 29(1): 93–112.
- Edlund JE and Edlund AE (2014) Contextual effects on abortion decisions: A brief report. *North American Journal of Psychology* 16(1): 159–162.
- Edwards D (2009) Post-abortion syndrome is a clinical reality: A critical and methodological reflection on the politics, biology and phenomenology of unwanted pregnancy and abortion. *Journal of Psychology in Africa* 19(3): 429–438.
- Eisen M (1983) Factors discriminating pregnancy resolution decisions of unmarried adolescents. *Genetic Psychology Monographs Genetic, Social & General Psychology Monographs; Genetic, Social, and General Psychology Monographs* 108(1): 69–95.
- Eisen M and Zellman GL (1984) Factors predicting pregnancy resolution decision satisfaction of unmarried adolescents. *The Journal of Genetic Psychology* 145(2): 231–239.
- Embree R (1998) Attitudes Toward Elective Abortion: Preliminary Evidence of Validity for the Personal Beliefs Scale. *Psychological Reports* 82: 1267.

- Erikson RC (1993) Abortion trauma: Application of a conflict model. *Journal of Prenatal & Perinatal Psychology & Health* 8(1): 33–42.
- Esposito CL and Basow S (1995) College students' attitudes toward abortion: The role of knowledge and demographic variables. *Journal of Applied Social Psychology* 25(22): 1996–2017.
- Evers-Kiebooms G, Denayer L, Decruyenaere M and Van den Berghe H (1993) Community attitudes towards prenatal testing for congenital handicap. *Journal of Reproductive and Infant Psychology* 11(1): 21–30.
- Falk R, Gispert M and Baucom D (1981) Personality factors related to black teenage pregnancy and abortion. *Psychology of Women Quarterly* 5(5): 737–746.
- Faure S and Loxton H (2003) Anxiety, depression and self-efficacy levels of women undergoing first trimester abortion. *South African Journal of Psychology* 33(1): 28–38.
- Fawcett J, Andrews V and Lester D (2000) Religiosity and attitudes about abortion. *Psychological Reports* 87(3): 980.
- Feil RN, Largey GP and Miller M (1984) Attitudes toward abortion as a means of sex selection. *The Journal of Psychology* 116: 269–272.
- Fergusson DM, Horwood JL and Ridder EM (2006) Abortion in young women and subsequent mental health. *Journal of Child Psychology and Psychiatry* 47: 16–24.
- Fingeber ME (1972) Psychological sequelae of abortion: anxiety and depression. *Journal of community psychology* 1(2): 221–226.
- Fisher, J and Lafarge C (2015) Women's experience of care when undergoing termination of pregnancy for fetal anomaly in England. *Journal of Reproductive and Infant Psychology* 33(1): 69–87.
- Gayton W, Fogg ME, Tavormina J, et al. (1976) Comparison of the MMPI and Mini-Mult with women who request abortion. *Journal of Clinical Psychology* 32(3): 648–651.
- Gibb G (1984) A comparative study of recidivists and contraceptors along the dimensions of locus of control and impulsivity. *International Journal of Psychology* 19: 581–591.
- Gibb G and Millard RJ (1981) Research on repeated abortion: state of the field: 1973-1979. *Psychological Reports* 48(2): 415–424.
- Gibb, GD and Millard R (1982) Divergent perspectives in abortion counseling. *Psychological Reports* 50(3): 819–822.
- Gillespie MW, Ten Vergert, EM and Kingma J (1988) Secular trends in abortion attitudes: 1975-1980-1985. *The Journal of Psychology* 122(4): 323–341.

- Goodwin P and Ogden J (2007) Women's reflections upon their past abortions: An exploration of how and why emotional reactions change over time. *Psychology & Health* 22(February): 231–248.
- Gordon A (1976) Psychological sequelae of abortion. *New Zealand Psychologist* 5: 37–47.
- Gordon R (1978) Efficacy of a group crisis-counseling program for men who accompany women seeking abortions. Authors: *American Journal of Community Psychology* 6(3): 239–246.
- Granberg D (1982) Family Size Preferences and Sexual Permissiveness as Factors Differentiating Abortion Activists. *Social Psychology Quarterly* 45(1): 15–23.
- Green E (1995) Teaching about psychological perspectives on abortion. *Teaching Psychology* 22(3): 202–212.
- Green JM, Snowdon C and Staham H (1993) Pregnant women's attitudes to abortion and prenatal screening. *Journal of Reproductive and Infant Psychology* 11(1): 31–39.
- Griffin-Carlson MS and Schwanenflugel PJ (1998) Adolescent abortion and parental notification: evidence for the importance of family functioning on the perceived quality of parental involvement in U.S. families. *Journal of Child Psychology and Psychiatry, and Allied Disciplines* 39(4): 543–553.
- Gruber E and Anderson MM (1990) Legislating parental involvement in adolescent abortion: Reexamining the arguments of Worthington and his colleagues. *American Psychologist*: 1174–1176.
- Guilbert E and Roter D (1997) Assessment of satisfaction with induced abortion procedure. *The Journal of Psychology* 131(2): 157–166.
- Handy J (1982) Psychological and social aspects of induced abortion. *British Journal of Clinical Psychology Health & Mental Health Services* 21(1): 29–41.
- Hess JA and Rueb JD (2005) Attitudes toward abortion, religion, and party affiliation among college students. *Current Psychology* 24(1): 24–42.
- Hillis JW and Crano WD (1973) Additive effects of utility and attitudinal supportiveness in the selection of information. *The Journal of Social Psychology* 89: 257–269.
- Huckfeldt R and Sprague J (2000) Political consequences of inconsistency: The accessibility and stability of abortion attitudes. *Political Psychology Political Processes & Political Issues* 21(1): 57–79.
- Jones JM (1974) Relations of personality factors and student nurses' attitudes toward abortion. *Psychological Reports* 35: 927–931.
- Kahn-Edrington M (1979) Abortion counseling. *The Counseling Psychologist* 8(1): 37–38.

- Kaysen D and Stake J (2001) From thought to deed: Understanding abortion activism. *Journal of Applied Social Psychology* 31(11): 2378–2400.
- Koslowsky M, Pratt GL and Wintrob RM (1976) The application of Guttman scale analysis to physicians' attitudes regarding abortion. *The Journal of Applied Psychology* 61(3): 301–304.
- Kunz P and Fernquist RM (1989) Opinions on abortion as measured by the lost-letter technique. *Psychological Reports* 65(3): 1343–1346.
- Lackey HS and Barry JR (1973) A measure of attitudes toward abortion. *Journal of Community Psychology*: 31–34.
- Lawson KL (2006) Expectations of the parenting experience and willingness to consider selective termination for Down Syndrome. *Journal of Reproductive and Infant Psychology* 24(1): 43–59.
- Lawson, KL and Walls-Ingram S (2010) Selective abortion for Down syndrome: The relation between the quality of intergroup contact, parenting expectations, and willingness to terminate. *Journal of Applied Social ...*: 554–578.
- Lee E (2000) Young people's attitudes to abortion for abnormality. *Feminism & Psychology* 10(3): 396–399.
- Lehtinen, P and Niemela P (1985) Psychological factors related to post-abortion 'subtle' contraceptive unreliability. *Scandinavian Journal of Psychology* 26(3): 277–284.
- Lemkau J (1988) Emotional sequelae of abortion: Implications for clinical practice. *Psychology of Women Quarterly* 12: 461–472.
- Lester D (1993) Legal abortions and neonatal homicide after Roe v Wade. *Psychological Reports* 72(1).
- Lewis CC (1987) Minors' competence to consent to abortion. *American Psychologist* 42: 84–88.
- Luscutoff S and Elms AC (1975) Advice in the abortion decision. *Journal of Counseling Psychology* 22(2): 140–146.
- Macleod C (2009) Why we should avoid the use of the term 'post-abortion syndrome'. Commentary on Boulind and Edwards (2000). *Journal of Psychology in Africa* 19(3): 423–428.
- Madden M (1988) Internal and external attributions following miscarriage. *Journal of Social and Clinical Psychology* 7(2-3): 113–121.
- Major B and Gramzow RH (1999) Abortion as stigma: cognitive and emotional implications of concealment. *Journal of Personality and Social Psychology* 77(4): 735–745.

- Major B, Mueller P and Hildebrandt K (1985) Attributions, expectations, and coping with abortion. *Journal of Personality and Social Psychology* 48(3): 585–599.
- Major B, Cozzarelli C, Sciacchitano M, et al. (1990) Perceived social support, self-efficacy, and adjustment to abortion. *Journal of Personality and Social Psychology* 59(3): 452–463.
- Major B, Zubek JM, Cooper ML, et al. (1997) Mixed messages: implications of social conflict and social support within close relationships for adjustment to a stressful life event. *Journal of Personality and Social Psychology* 72: 1349–1363.
- Major B, Richards C, Cooper ML, et al. (1998) Personal Resilience, Cognitive Appraisals, and Coping: An Integrative Model of Adjustment to Abortion. *Journal of Personality and Social Psychology* 74(3): 735–752.
- Major B, Appelbaum M, Beckman L, et al. (2009) Abortion and mental health: Evaluating the evidence. *American Psychologist* 64(9): 863–90.
- Major B, Cozzarelli C, Testa M and Mueller P (1992) Male partners' appraisals of undesired pregnancy and abortion: Implications for women's adjustment to abortion. *Journal of Applied Social Psychology Health & Mental Health Services* 22(8): 599–614.
- Marsh C and Calderbank D (1986) Public attitudes to elective abortion 1967–1982: Stability and complexity. Marsh, . *Journal of Reproductive and Infant Psychology* 4(1-2): 1–12.
- Martin C (1973) Psychological problems of abortion for the unwed teenage girl. *Genetic Psychology Monographs* 88(1): 23–110.
- Maxwell G (1977) Views of Dunedin public on the recommendations of the Royal Commission on Contraception, Sterilization and Abortion in New Zealand. *New Zealand Psychologist* 6(2): 134–145.
- Mdleleni-Bookholane T (2007) Factors Related to and the consequences of the termination of pregnancy at the Umtata General Hospital, Eastern Cape. *South African Journal of Psychology* 37(2): 245–259.
- Meikle S and Gerritse R (1973) A comparison of husband-wife responses to pregnancy. *Journal of Psychology: Interdisciplinary and Applied* 83(1): 17–23.
- Melamed L (1975) Therapeutic abortion in a midwestern city. *Psychological Reports* 37(3): 1143–1146.
- Melton GB (1987a) Legal regulation of adolescent abortion: Unintended effects. *American Psychologist* 42: 79–83.
- Melton GB (1987b) Psychology in the Public Forum Adolescent Abortion Psychological Perspectives on Public Policy. *American Psychologist* 42(I): 69–72.
- Melton GB (1990) Knowing what we do know: APA and adolescent abortion. *American Psychologist*: 1990: 1171–1173.

- Melton GB and Russo NF (1987) Psychology in the Public Forum Adolescent Abortion Psychological Perspectives on Public Policy. *American Psychologist* 42(1): 69–72.
- Mojapelo-Batka, EM and Schoeman J (2003) Voluntary termination of pregnancy: moral concerns and emotional experiences among black South African adolescents. *South African Journal of Psychology* 33(3): 144–153.
- Moseley DT, Follingstad DR, Harley H, et al. (1981) Psychological factors that predict reaction to abortion. *Journal of clinical psychology* 37: 276–9.
- Mueller P and Major B (1989) Self-blame, self-efficacy, and adjustment to abortion. *Journal of Personality and Social Psychology* 57(6): 1059–68.
- Muffel N, Speckhard A and Sivuha S (2002) Predictors of posttraumatic stress disorder following abortion in a former Soviet Union country. *Journal of Prenatal & Perinatal Psychology & Health* 17(1): 41–61.
- Mwaba K and Naidoo P (2006) Knowledge, beliefs and attitudes regarding abortion in South Africa among a sample of university students. *Journal of Psychology in Africa* 16(1): 53–58.
- Nazare B, Fonseca A and Canavarro MC (2013) Adaptive and maladaptive grief responses following TOPFA: Actor and partner effects of coping strategies. *Journal of Reproductive and Infant Psychology* 31(3): 257–273.
- Nazare B, Fonseca A and Canavarro MC (2012) Grief following termination of pregnancy for fetal abnormality: does marital intimacy foster short-term couple congruence? *Journal of Reproductive and Infant Psychology* 30(2): 168–179.
- Ney PG, Fung T and Wickett A (1993) Relationship between induced abortion and child abuse and neglect: Four studies. *Journal of Prenatal & Perinatal Psychology & Health* 8(1): 43–63.
- Osborne D and Davies PG (2012) When Benevolence Backfires: Benevolent Sexists' Opposition to Elective and Traumatic Abortion. *Journal of Applied Social Psychology* 42: 291–307.
- Parsons NK, Richards HC and Kanter GD (1990) Validation of a scale to measure reasoning about abortion. *Journal of Counseling Psychology* 37(1): 107–112.
- Patel CJ and Myeni MC (2008) Attitudes toward abortion in a sample of South African female university students. *Journal of Applied Social Psychology* 38: 736–750.
- Petkova KG, Azjen I and Driver B (1995) Salience of anti-abortion beliefs and commitment to an attitudinal position: On the strength, structure, and predictive validity of anti-abortion attitudes. *Journal of Applied Social Psychology* 25(6): 463–483.
- Phifer JA and Lester D (2000) Femininity and abortion attitudes. *Psychological Reports* 87(3): 956.



- Pilisuk M (1997) Resolving Ideological Clashes Through Dialogue : Abortion as a Case Study. *Peace and Conflict: Journal of Peace Psychology* 3(2): 135–147.
- Posavac E and Miller T (1990) Some problems caused by not having a conceptual foundation for health research: An illustration from studies of the psychological effects of abortion. *Psychology & Health Health & Mental Health Services* 5(1): 13–23.
- Quinton WJ, Major B and Richards C (2001) Adolescents and adjustment to abortion: Are minors at greater risk? *Psychology, Public Policy, and Law* 7(3): 491–514.
- Richards J (1978) An ecological analysis of the impact of the U.S. Supreme Court's 1973 abortion decision. *Journal of Applied Social Psychology* 8(1): 15–28.
- Robbins JM (1979) Objective versus subjective responses to abortion. *Journal of Consulting and Clinical Psychology* 47(5): 994–995.
- Robson F (2002) 'Yes!-A chance to tell my side of the story': A case study of a male partner of a woman undergoing termination of pregnancy for foetal abnormality. *Journal of Health Psychology* 7(2): 183–193.
- Rodman H and Griffith S (1982) Adolescent autonomy and minors' legal rights: Contraception and abortion. *Source Journal of Applied Developmental Psychology Psychosocial & Personality Development Civil Rights & Civil Law* 3(4): 307–318.
- Roman RE and Lester D (1999) Abortion attitudes and personality. *Psychological Reports* 85(2): 528.
- Romer D (1983) Effects of own attitude on polarization of judgment. *Journal of Personality and Social Psychology* 44(2): 273–284.
- Rosen A (1992) Beliefs, Attitudes, and Intention in the Context of Abortion1. *Journal of Applied Social Psychology* 22(18): 1464–1480.
- Rosen A and von Knorring K (1989) Attitudes to abortion methods and participation effects. *Social Behaviour Health & Mental Health Services* 4(2): 71–82.
- Rousset C, Brulfert C, Séjourné N, et al. (2011) Posttraumatic Stress Disorder and psychological distress following medical and surgical abortion. *Journal of Reproductive and Infant Psychology* 29(5): 506–517.
- Russo NF and Dabul AJ (1997) The relationship of abortion to well-being: do race and religion make a difference? *Professional psychology, research and practice* 28(1): 23–31.
- Russo NF and Denious JE (2001) Violence in the lives of women having abortions: Implications for practice and public policy. *Professional Psychology: Research and Practice* 32(2): 142–149.
- Russo NF and Zierk KL (1992) Abortion , Childbearing , and Women 's Well-Being. *Professional Psychology: Research and Practice* 23(4): 269–280.

- Rzepka JR (1980) Counseling the abortion patient: a pastoral perspective. *Pastoral psychology* 3(3): 168–80.
- Sahar G and Karasawa K (2005) Is the Personal Always Political? A Cross-Cultural Analysis of Abortion Attitudes. *Basic and Applied Social Psychology* 27(4): 285–296.
- Saucer PR (1992) Correlation Between Rates of Rape and Abortion. *Psychological Reports* 70: 786.
- Scarr G (1972) Survey of Canterbury Anglican women's attitudes to abortion. *New Zealand Psychologist* 1(2): 50–57.
- Schmidt R and Priest R (1981) The effects of termination of pregnancy: A follow-up study of psychiatric referrals. *British Journal of Medical Psychology Health & Mental Health Services* 54(33370): 267–276.
- Scott J (1989) Conflicting Beliefs About Abortion: Legal Approval and Moral Doubts. *Social Psychology Quarterly* 42(4): 319–326.
- Shaw PC, Funderburk C and Franklin B (1979) An investigation of the abortion decision process. *Psychology: A Journal of Human Behavior* 16(2): 11–19.
- Shusterman LR (1976) The psychosocial factors of the abortion experience: a critical review. *Psychology of Women Quarterly* 1(1): 79–106.
- Smetana JG (1981) Reasoning in the personal and moral domains: Adolescent and young adult women's decision-making regarding abortion. *Journal of Applied Developmental Psychology Psychosocial & Personality Development* 2(3): 211–226.
- Smith LB, Adler NE and Tschann JM (1999) Underreporting sensitive behaviors: the case of young women's willingness to report abortion. *Health Psychology* 18(1): 37–43.
- Spadafora M and Pasadeos Y (1986) Perceived credibility of a neutral abortion-related message and its sponsor. *The Journal of Psychology* 120(2): 137–141.
- Speckhard A and Rue V (1993) Complicated mourning: Dynamics of impacted post abortion grief. *Journal of Prenatal & Perinatal Psychology & Health Neuroses & Anxiety Disorders Psychotherapy & Psychotherapeutic Counseling* 8(1): 5–32.
- Speckhard A and Mufel N (2005) No Title No Title. *Journal of Prenatal and Perinatal Psychology and Health* 19(4): 289–303.
- Speckhard A and Muffel N (2003) Universal Responses to Abortion? Attachment, Trauma, and Grief Responses in Women Following Abortion. *Journal of Prenatal & Perinatal Psychology & Health* 18(1): 3–37.
- Stalhandske ML, Ekstrand M and Tyden T (2011) Existential experiences and strategies in relation to induced abortion: An interview study with 24 Swedish women. *Archive for the Psychology of Religions* 33(3): 345–370.

- Steinberg L, Cauffman E, Woolard J, et al. (2009) Are adolescents less mature than adults?: Minors' access to abortion, the juvenile death penalty, and the alleged APA 'flip-flop.' *American Psychologist* 64: 583–594.
- Suffla S (1997) Experiences of induced abortion among a group of South African women. *South African Journal of Psychology* 27(4): 214–222.
- Teichman Y (1988) Psychological aspects of abortion and miscarriage. *Psychologia: Israel Journal of Psychology* 1: 58–73.
- Terjestam Y (1989) The body self test: A percept-genetic method for the study of psychological abortion reactions. *Psychological Research Bulletin* 29(8): 23.
- Thatté S and Pundlik J (1989) Psychological sequelae of MTP: A study of anxiety and hostility in married and unmarried abortees. *Indian Journal of Clinical Psychology Health & Mental Health Services* 16(1): 29–33.
- Thomas T and Tori C (1999) Sequelae of abortion and relinquishment of child custody among women with major psychiatric disorders. *Psychological Reports* 84(3): 773–790.
- Thornton J (1994) The ethics of prenatal screening and abortion for fetal abnormality: A personal view. *Journal of Reproductive and Infant Psychology Health & Mental Health Services* 12(3): 155–161.
- Van Emmerik AAP, Kamphuis JH and Emmelkamp PMJ (2008) Prevalence and prediction of re-experiencing and avoidance after elective surgical abortion: A prospective study. *Clinical Psychology & Psychotherapy* 15: 378–385.
- Van Husen J (1988) The development of fears, phobias, and restrictive patterns of adaptation following attempted abortions. *Journal of Prenatal & Perinatal Psychology & Health* 2(3): 179–185.
- Vander Ryk AL, O'Neill MJ and Lester D (2013) Attitudes toward abortion, capital punishment, and assisted suicide. *Psychological Reports* 85(3): 904–910.
- Vaz L and Kanekar S (1992) Indian college students' attitudes toward abortion in different contexts. *Journal of Applied Social Psychology* 22(7): 567–582.
- Waite M (1974) Consultant psychiatrists and abortion. *Psychological Medicine* 4(1): 74–88.
- Wall S, Frieze I, Ferligoj A, et al. (1999) Gender role and religion as predictors of attitude toward abortion in Croatia, Slovenia, the Czech Republic, and the United States. *Journal of Cross-Cultural Psychology* 30(4): 443–465.
- Watkins H (1986) Treating the trauma of abortion. *Journal of Prenatal and Perinatal Psychology and Health* 1(2): 135–142.
- Werner PD (1978) Personality and Attitude-Activism Correspondence. *Journal of Personality and Social Psychology* 36(12): 1375–1390.

- Werner PD (1993) A Q-sort measure of beliefs about abortion. *Educational and Psychological measurement* 53(2): 513–521.
- Wiederman MW and Senisbaugh C (1995) The acceptance of legalized abortion. *The Journal of Social Psychology* 135(6): 785–787.
- Worthington EL, Larson DB, Brubaker MW, Colecchi C, Berry JT and Morrow D (1989) The benefits of legislation requiring parental involvement prior to adolescent abortion. *American Psychologist*: 1542–1545.
- Zhang YW, Yu JW and Li J (2007) Application of psychological intervention evaluated by Symptom Checklist 90 on women accepting artificial abortion. *Chinese Journal of Clinical Psychology* 15(5): 532–533.
- Zucker GS (1999) Attributional and symbolic predictors of abortion attitudes. *Journal of Applied Social Psychology* 29(6): 1218–1245.
